# Supplementary material
Source: HighWire-hosted journal article supplement (http://sti.bmj.com/highwire/filestream/156043/field_highwire_adjunct_files/0/Appendix_1.pdf)
Supplement: Appendix_1.pdf [file Appendix_1.pdf]

## APPENDIX 1: SAMPLE SIZE CALCULATION

$H_0$  = No difference is found in STI and HIV prevalence between MSW and MSM.

$H_1$  = A significant difference is ST and HIV between MSW and MSM.

In order to challenge this null hypothesis, the following calculation for sample size will be used:

Type I error= 0.05 ( $\alpha=5\%$ )

Type II error= 0.20 ( $\beta=20\%$ )

STI prevalence among MSW in Antwerp and Sydney (excluding hepatitis B) 31.4% [1], 31.9% [2], respectively.

HIV prevalence among MSW in Sydney was 10.8% [2], 6.5% in Belgium [1] and 12.2% in Spain [3].

Expected HIV prevalence among MSM in Israel is 1% [4] and in a study from other developed countries is 1.5% [5].

The difference (d) in STI rates between MSW and MSM is supposed to be 10%.

Sample size for proportions= $n = Z_{2\alpha}^2 \pi(1-\pi)/d^2$ . Continuity correction will be calculated  $2/|\pi_1-\pi_2|$ .  $\pi_1$  is the proportion of STD in the study group and  $\pi_2$  is the proportion of STI in the control group.

Sample size for STI=  $1.96^2 * 0.1 * 0.9 / 0.1^2 = 34.5$

Continuity correction=  $2/|0.3-0.1|=10$

Thus, the total number of participants in each group: study (MSW) and control (MSM) should be greater than 45.

A sample of 50 participants in each group will increase both the precision and the power of the study, and decrease the standard error in this non-matched case-control study.

## REFERENCES:

1. Leuridan E, wouters K, Stalpaert M, et al. Male sex workers in Atwerp, Belgium: a descriptive study. *Inter J STD & AIDS* 2005;**16**:744-748.
2. Estcourt CS, Marks C, Rohrheim R, et al. HIV, sexually transmitted infections, and risk behaviours in male commercial sex workers in Sydney. *Sex Transm Infect* 2000;**76**(4):294-298.
3. Belza MJ, and the HIV Study Group. Risk of HIV infection among male sex workers in Spain. *Sex Transm Infect* 2005;**81**:85-88.

4. Lister NA, Smith A, Tabrizi S, et al. Screening for *Neisseria gonorrhoeae* and *Chlamidia trachomatis* in men who have sex with men at male-only saunas. *Sex Transm Dis* 2003;**30**(12):886-889.
5. Murphey, Charlett A, Jordan LF, et al. HIV incidence appears constant in men who have sex with men despite widespread use of effective antiretroviral therapy. *AIDS* 2004;**18**(2):365-372.
